# Supplementary material for: Individualized Nomogram for Predicting Survival in Patients with Brain Metastases After Stereotactic Radiosurgery Utilizing Driver Gene Mutations and Volumetric Surrogates
Source: Frontiers journal article supplement (doi:10.3389/fonc.2021.659538), 2021-05-13

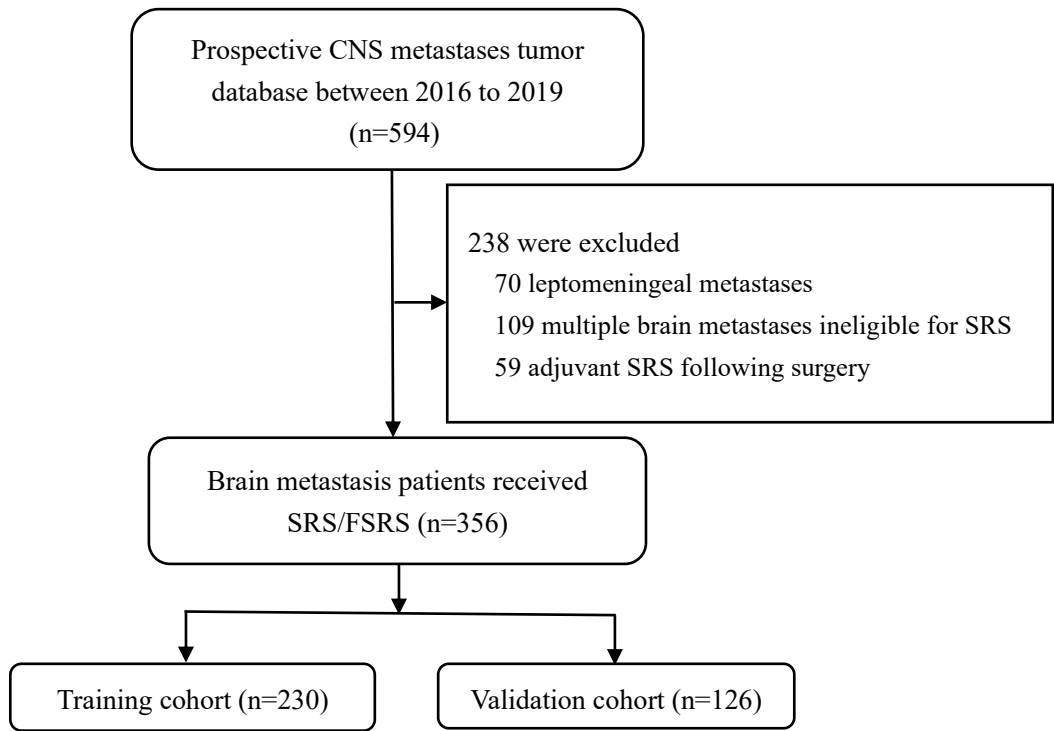

Supplement: Data_Sheet_1.PDF [file Data_Sheet_1.PDF]
